# Supplementary material for: Oxygen vacancies dependent Au nanoparticle deposition and CO oxidation
Source: Royal Society of Chemistry journal article supplement (doi:10.1039/c6ra14778j), 2016-01-01
Supplement: c6ra14778j1.pdf [file c6ra14778j1.pdf]

## **Supporting Information**

### **Oxygen Vacancies Dependent Au Nanoparticle Deposition and CO Oxidation**

Xiuxiu Wang,<sup>a</sup> Beibei Chen,<sup>a</sup> Guozhu Chen,<sup>b,\*</sup> Xuan Sun<sup>a,\*</sup>

*<sup>a</sup>Key Laboratory of Colloid and Interface Chemistry, Ministry of Education,  
Shandong University, Jinan 250100, P. R. China*

*<sup>b</sup>School of Chemistry and Chemical Engineering, Jinan University, P. R. China*

E-mail: [sunxuan@sdu.edu.cn](mailto:sunxuan@sdu.edu.cn)

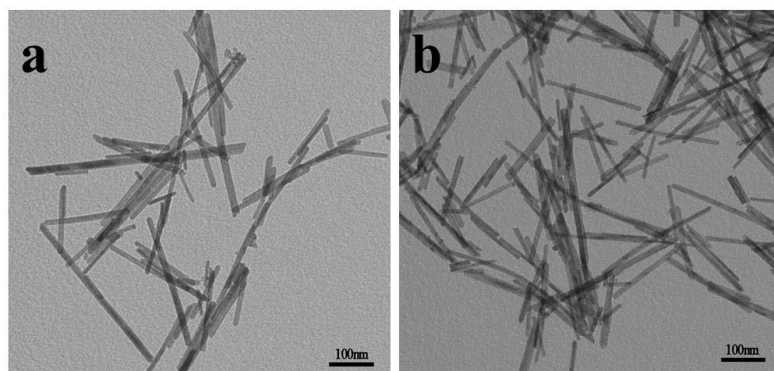

**Figure S1.** TEM images of (a)  $\text{CeO}_2$  NRs (b) VC- $\text{CeO}_2$

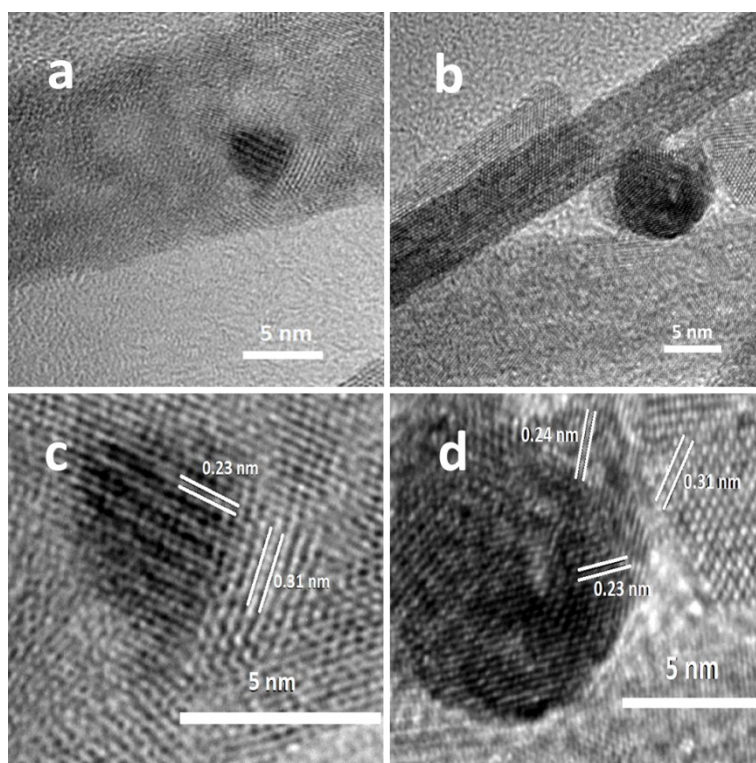

**Figure S2.** TEM images of (a)  $\text{Au/CeO}_2$ , (b)  $\text{Au/VC-CeO}_2$  and HRTEM identification of (c)  $\text{Au/CeO}_2$ , (d)  $\text{Au/VC-CeO}_2$  after the catalyzed CO oxidation.

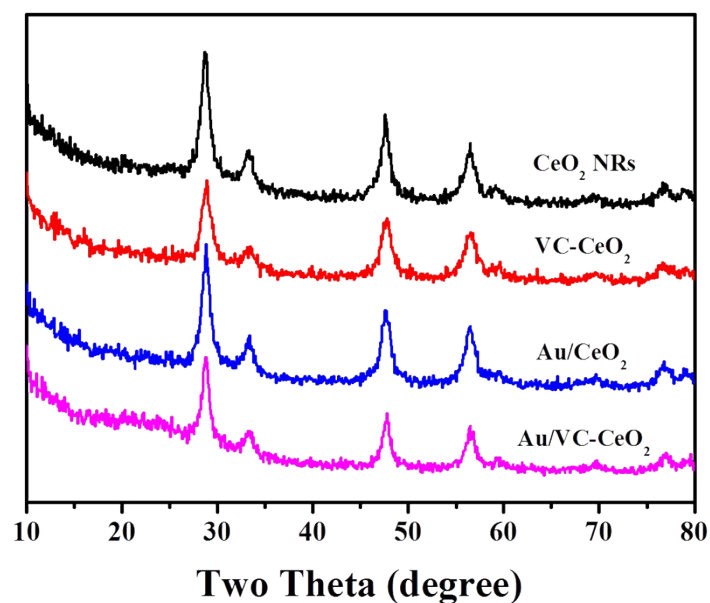

**Figure S3.** XRD patterns of  $\text{CeO}_2$  NRs,  $\text{VC-CeO}_2$ ,  $\text{Au/CeO}_2$ , and  $\text{Au/VC-CeO}_2$ .

**Table S1.** Content of Au and O species calculated from XPS.

| Catalysts            | $\text{Au}^0$ | $\text{Au}^+$ | $\text{Au}^{3+}$ | $\text{O}_\beta/\text{O}_\alpha$ |
|----------------------|---------------|---------------|------------------|----------------------------------|
| $\text{CeO}_2$ NRs   | --            | --            | --               | <b>0.42</b>                      |
| $\text{VC-CeO}_2$    | --            | --            | --               | <b>0.98</b>                      |
| $\text{Au/CeO}_2$    | <b>31.4%</b>  | <b>18.6%</b>  | <b>50.0%</b>     | <b>0.55</b>                      |
| $\text{Au/VC-CeO}_2$ | <b>34.6%</b>  | <b>41.0%</b>  | <b>24.4%</b>     | <b>0.53</b>                      |

**Table S2.** Content of Au and Ce species calculated from XPS after CO oxidation.

| Catalysts            | $\text{Au}^0$ | $\text{Au}^+$ | $\text{Au}^{3+}$ | $\text{Ce}^{3+}$ |
|----------------------|---------------|---------------|------------------|------------------|
| $\text{Au/CeO}_2$    | 73.1%         | 16.2%         | 10.69%           | 27.56%           |
| $\text{Au/VC-CeO}_2$ | 84.68%        | 15.32%        | 0%               | 26.18%           |

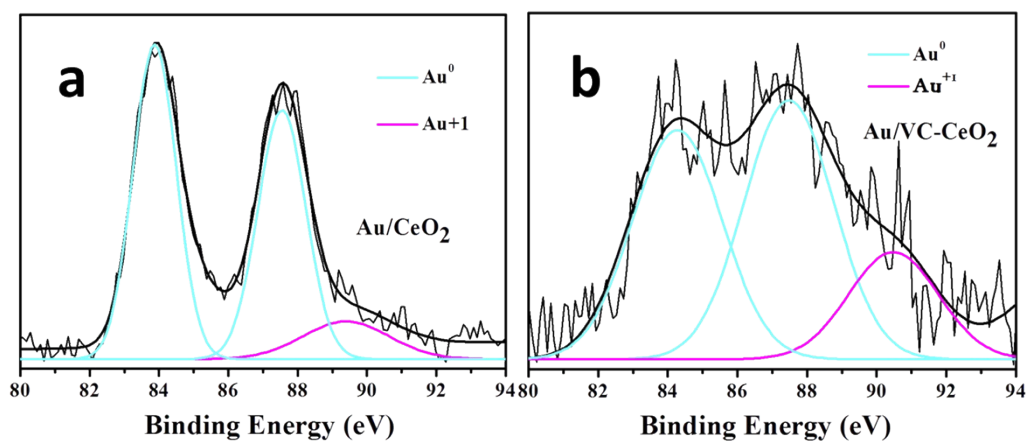

**Figure S4.** XPS spectra of (a) Au/CeO<sub>2</sub>, and (b) Au/VC-CeO<sub>2</sub> after CO oxidation.

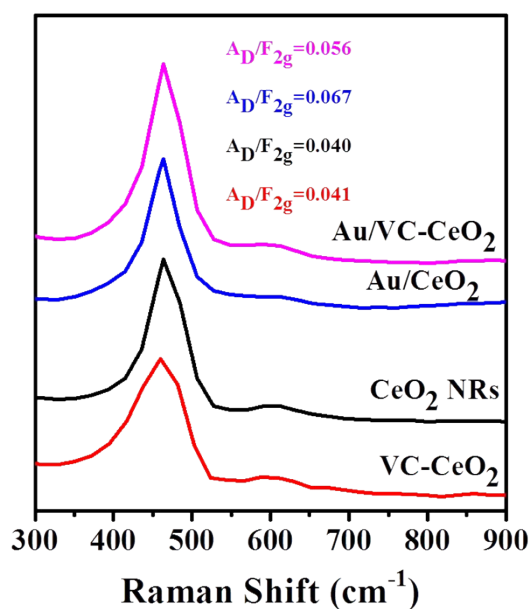

**Figure S5.** Raman spectra of CeO<sub>2</sub> NRs, VC-CeO<sub>2</sub>, Au/CeO<sub>2</sub>, and Au/VC-CeO<sub>2</sub> after CO oxidation.

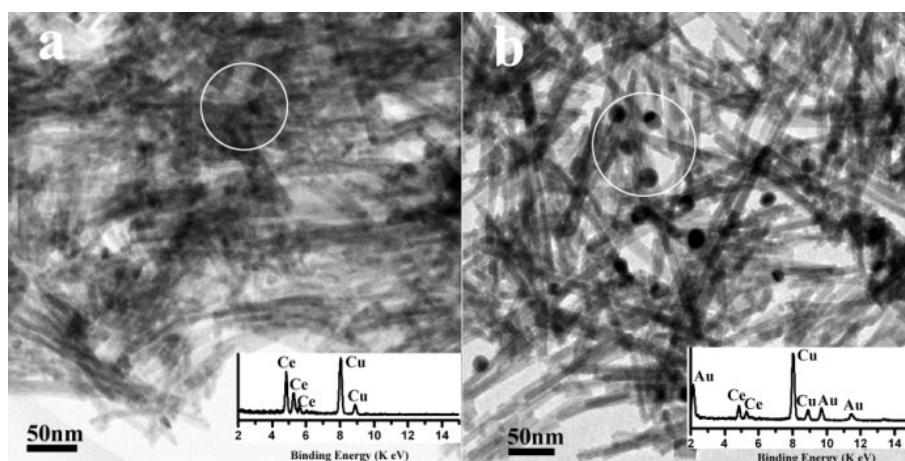

**Figure S6.** TEM observation of (a) pristine CeO<sub>2</sub> NRs and (b) VC-treated CeO<sub>2</sub> NRs

reacted with  $\text{HAuCl}_4$ , respectively.
